# Supplementary material
Source: MDPI journal article supplement (https://www.mdpi.com/2071-1050/11/20/5817)
Supplement: s1 [file s1]

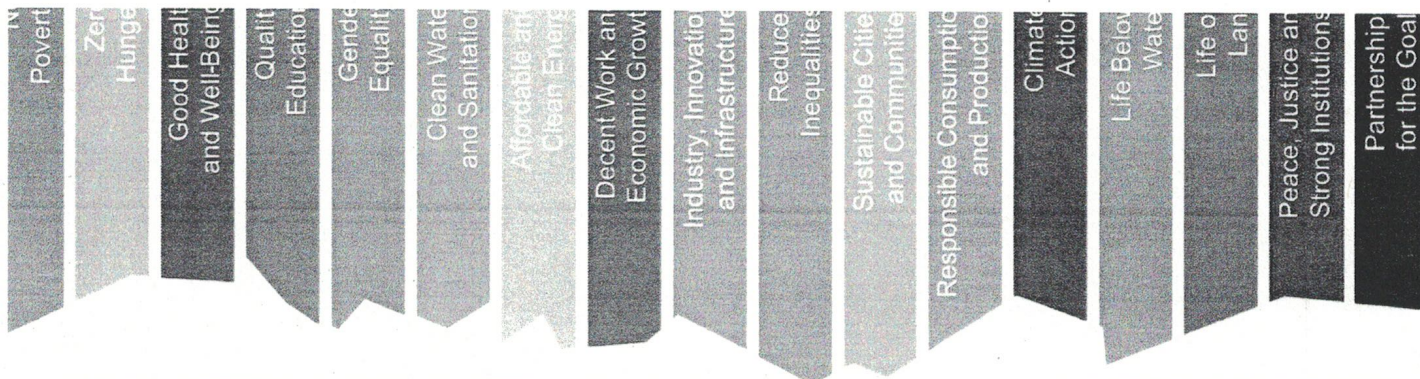

# 'It's our future Earth' Conference 2.0

Leveraging STEM and Global Competency skills  
to deliver the UN Sustainable Development Goals

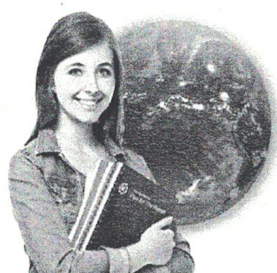

Young Persons'  
Plan for the Planet Program

29 Nov – 1 Dec 2018, Mauritius

Engaging, Connecting and Empowering Youth to Deliver the UN Sustainable Development Goals

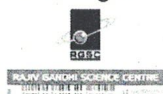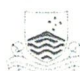

Australian  
National  
University

Questacon  
The National Science and Technology Centre

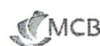

Curtin Mauritius

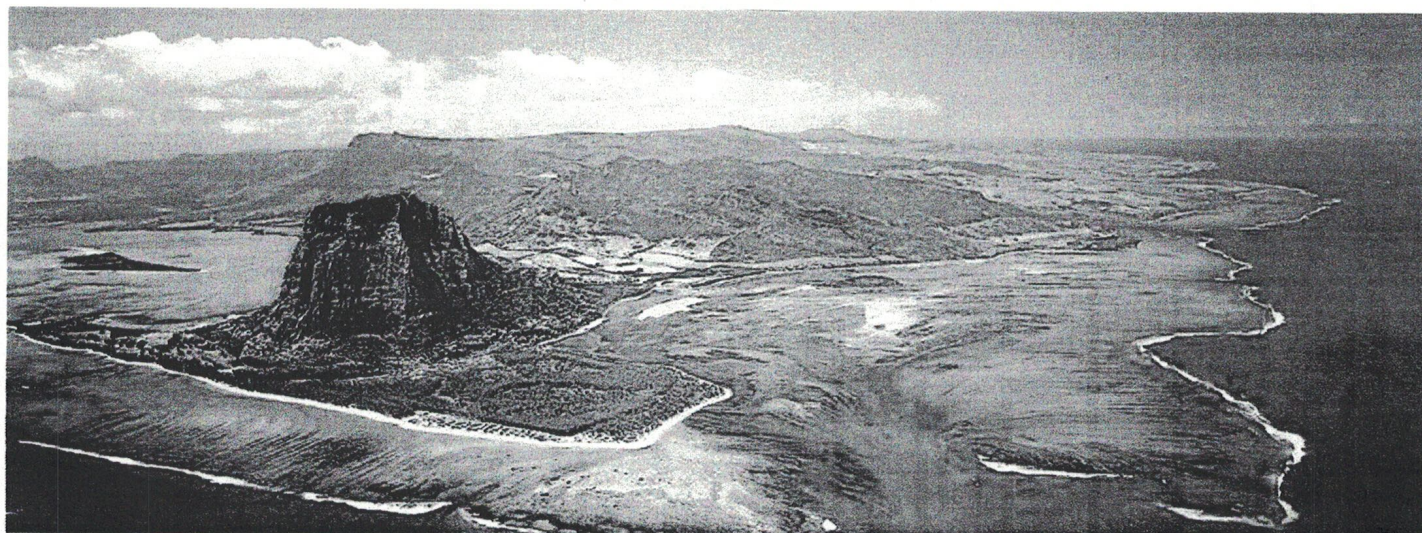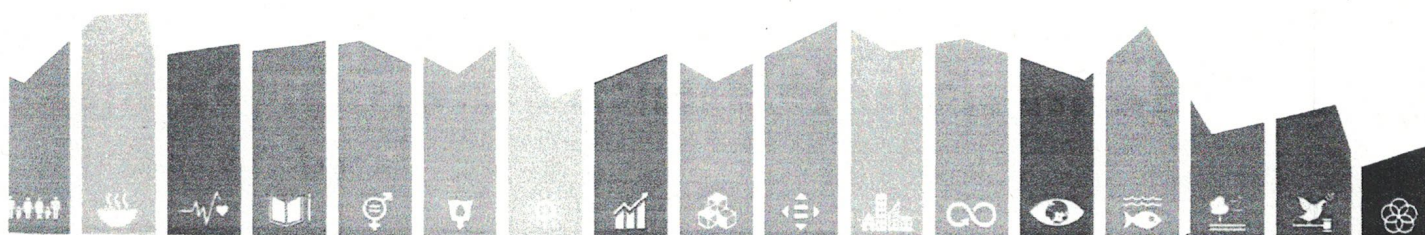



|                 | Day 1 (Rajiv Gandhi Science Centre /<br>MWF/ Reception hosted by Australian<br>High Com at Henessy Park Hotel)                                                                            | Friday<br>30 Nov | Day 2 (Curtin Mauritius /Charles<br>Telfair Campus, Moka/ Tour<br>followed by Dinner hosted by<br>Australia at Henessy Park Hotel)                                                                                                    | Sat<br>1 Dec | Day 3 at Mauritius Commercial<br>Bank, St Jean                                                                                                                              |
|-----------------|-------------------------------------------------------------------------------------------------------------------------------------------------------------------------------------------|------------------|---------------------------------------------------------------------------------------------------------------------------------------------------------------------------------------------------------------------------------------|--------------|-----------------------------------------------------------------------------------------------------------------------------------------------------------------------------|
| 8.45            | Registration                                                                                                                                                                              | 8.45             | Registration                                                                                                                                                                                                                          | 7.45         | Australian Students reach MCB<br>Ebene                                                                                                                                      |
|                 |                                                                                                                                                                                           |                  |                                                                                                                                                                                                                                       | 8.00         | Arrival of Mauritian Participants                                                                                                                                           |
| 09.00-<br>09.20 | Welcome<br>Dr Naugah (Chairperson, RGSC)<br>Mr Ian Chambers (Project Director)<br>H.E (Ms) Jenny Dee - High Commissioner<br>of Australia                                                  | 9.00             | Welcome and Introduction<br>- VC Curtin & Curtin Mauritius<br>- Prof. Brian Schmidt, VC ANU                                                                                                                                           | 8.30         | Australian Students –TOUR of<br>MCB building<br>Welcome and Introduction<br>- Representative, MCB<br>- Prof Graham Durant, Questacon                                        |
| 9.20            | Program Overview & Day 1                                                                                                                                                                  | 9.10             | Program Overview & Day 2                                                                                                                                                                                                              | 8.40         | Program Overview & Day 3                                                                                                                                                    |
| 9.25            | Understanding the Big Picture:<br><br>Leveraging STEM skills to deliver the SDGs.<br>Ian Chambers (ANU)<br><br>- Mauritius Student Presentations<br><br>- Aust. Student Presentations (1) | 9.20             | Turning SDG Plans into Action:<br>Leveraging the Balance the Planet<br>Approach<br><br>- Prof: David Gibson, Curtin University<br><br>- Pimlico High School: The Reef<br>Challenge!<br><br>- Mauritian and Aust. Student Pres.<br>(2) | 8.45         | Leadership and Mentoring other<br>schools and other countries<br><br>- Prof. David Gibson<br><br>- Student Mentoring<br>Presentations - Kent St and<br>Pimlico High Schools |
|                 |                                                                                                                                                                                           | 10.15            | Morning Tea                                                                                                                                                                                                                           | 9.30         | Singapore Science Centre 2019<br>Plans                                                                                                                                      |
| 10.30           | Joint Student Workshop 1:<br><br>Building the first International YPPP<br>(integration of 17 SDGs)                                                                                        | 10.30            | Joint Student Workshop 3:<br><br>Identifying SDG Special Delivery<br>Projects for Australia and Mauritius.                                                                                                                            | 9.45         | Joint Student Workshop 6:<br><br>Leadership and Mentoring for<br>2019 (Student Workshop)                                                                                    |
| 11.45           | Lunch                                                                                                                                                                                     | 12.30            | Lunch                                                                                                                                                                                                                                 | 10.55        | Break                                                                                                                                                                       |
| 12.00           | Students board transport for IAA                                                                                                                                                          |                  |                                                                                                                                                                                                                                       |              |                                                                                                                                                                             |
| 13.00           | STEM & SDGs in Action<br><br>Sustainability Skills Workshop 2 at Ile Aux<br>aigrettes Nature Reserve – <b>RGSC provides<br/>transport</b>                                                 | 13.30            | Joint Student Workshop 4:<br><br>Designing the SDG Special Delivery<br>Projects - Balance the Planet<br>Application                                                                                                                   | 11.00        | Formal Closing ceremony of<br>Conference<br><br>Mauritius Minister Education and<br>Human Resources, Tertiary<br>Education and Scientific Research                          |
| 14.00           | Sustainability Skills Workshop 2 (Cont.)                                                                                                                                                  |                  | Joint Student Workshop 4 (Cont.)                                                                                                                                                                                                      | 12.00        | Cocktail                                                                                                                                                                    |
| 15.00           | Coffee                                                                                                                                                                                    | 15.00            | Coffee                                                                                                                                                                                                                                | 13.00        | <b>Conference Close for Mauritian<br/>Students</b>                                                                                                                          |
| 15.15           | Sustainability Skills Workshop 2: (Cont)                                                                                                                                                  | 15.15            | STEM & SDGs in Action<br>Sustainability Skills Workshop 5:<br>Northern Mauritius Sustainable<br>Development Tour – <b>RGSC provides<br/>Transport</b>                                                                                 |              |                                                                                                                                                                             |
| 17.00           | All participants return to Hennessy Park<br>Hotel                                                                                                                                         | 17.30            | All participants return to Hennessy<br>Park Hotel                                                                                                                                                                                     |              |                                                                                                                                                                             |
| 18.30           | Welcome Reception<br><br>Hosted by Australian High Commission:<br>The importance of Science and<br>Partnerships in delivering the SDGs                                                    | 19.00            | Young Persons' Plan for the Planet:<br>Formal Dinner and Presentations<br><br>Sponsored by Frank Fenner<br>Foundation<br><br><b>Keynote Speaker:</b> Dr Jayantee<br>Naugah, Rajiv Gandhi Science Centre<br>Chairperson                |              |                                                                                                                                                                             |
| 20.00           | Close<br><br>Mauritians Students should arrange their<br>own transport to go home                                                                                                         | 21.00            | Close<br><br>Mauritians Students should arrange<br>their own transport to go home                                                                                                                                                     |              |                                                                                                                                                                             |



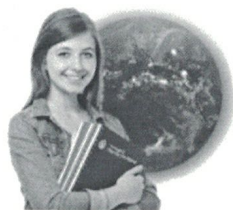

## 'It's our future Earth 2.0': Conference Overview

### Introduction

Welcome to the Young Persons' Plan for the Planet 'It's our future Earth 2.0' Conference. We're delighted that you are able to take part in the Conference, and look forward to a very productive as well as enjoyable 3 days. To assist you with this, we have provided this Conference Overview document to provide an overall understanding of how each part of the Conference will work so you can get maximum benefit from your participation.

### Presentations

Throughout the Conference there will be a series of presentations and presentation videos by our guest speakers. There will also be student presentations of both the work that has been done by the schools in Mauritius and Australia this year. A list of the schools and when their presentations will take place are outlined below. If you have a PowerPoint presentation, let us know, and we can make sure it is loaded up and ready to go for your presentation so everything can run smoothly during the Conference.

| Day 1 Student / School Presentations                                                                                     | Day 2 Student / School Presentations                                                                                                                 | Day 3 Student / School Presentations                                                   |
|--------------------------------------------------------------------------------------------------------------------------|------------------------------------------------------------------------------------------------------------------------------------------------------|----------------------------------------------------------------------------------------|
| Mauritius Schools (1)<br>Brindabella (ACT State Plan)<br>Morialta (SA State Plan)<br>Kolbe and Viewbank (Vic State Plan) | Mauritius Schools (2)<br>Pimlico - Reef Presentation and Qld State Plan with Indooroopilly)<br>Shenton (SDGs into Projects)<br>Byron Bay - SDG Focus | Kent St WA Sate Plan and Mentoring with Mauritius<br>Pimlico Mentoring within Country) |

### Conference Workshops

As well as the presentation by guest speakers and schools and students, there will be a series of workshops throughout the Conference where teams comprising of both Mauritian and Australian students will work together based on the three key themes of the Conference – Building the International Plan, Turning Plans into Projects and Mentoring for 2019. Teams have been developed based on each SDG and you will have been allocated to an SDG team. A list of the SDG Teams and your team allocation is included in this Conference Pack. You will have Workshop Briefs in your Conference Pack that outline how your workshop will run, and the outcome your team needs to achieve. You also will have in your Conference Pack the Worksheets that you can complete to summarise your outcomes. These workshops are all designed to help you build and strengthen your skills in strategic planning, STEM and Global Competencies. They are also designed so you can learn from each other, see the difference in cultural perspectives and different ways of approaching challenges and finding solutions. They are also designed so you can have fun working together – so enjoy! After each workshop, we will have the opportunity for some of the groups to present back to the larger group, so be prepared! Each group will also have a facilitator / mentor from our teacher and mentor team to assist with any questions that might arise in your workshops.

## Experiential Workshops

As well as the Conference Workshops, we also have arranged a series of Experiential Workshops where you will visit a range of locations at which you will be able to see first hand the challenges and opportunities presented in achieving Sustainable Development. These include the Mauritius Wildlife Foundation, a range of sites in northern Mauritius where you will look at the issues of sustainable tourism, as well as a tour of the Mauritius Commercial Bank building, a completely sustainable building. You will see all of your Science, Technology, Engineering and Mathematics skills demonstrated in this amazing building. The Mauritius Commercial Bank has kindly opened this building for the last day of the Conference. You have Worksheets allocated for each of these events as well, so don't forget to complete them as you go. It will make these experiences not only enjoyable, but also important learning experiences as well!

## Special Events

There are a number of special events that will be taking place throughout the Conference. These include the Reception hosted by the Australian High Commission on the first evening, as well as the Conference Dinner that will be held on the second evening of the Conference. The Conference Dinner will also be our opportunity for presentations to everyone for all the hard work you have put in over the year and at the Conference. Conference attire is smart business casual or school uniform.

## Research

As part of the Conference, there will be some simple research surveys for you to complete on the final day. These are very important in helping us not only understand which you have learned, but also how to make the Young Persons' Plan for the Planet Program and Conference even more enjoyable and productive in 2019. Your assistance in completing these and handing them in will make a great difference not only for you, but also for future countries, schools and students joining the program in future.

## Facilitators / Mentor Overview

As we mentioned, each of the workshops will have an SDG on which your team will focus. You will have a facilitator / mentor to assist with any questions or issues that arise with this. As an SDG student team, you will need to appoint your own team leader, scribe and presenter. The role of your facilitator / mentor is to assist with any questions you may have about the Conference, Presentations and Workshops.

## Anything else, let us know

Our aim is to make sure that you have a very enjoyable conference. Therefore, if there are any issues that arise during the conference, simply let your Facilitator / Mentor or one of the Young Persons' Plan for the Planet program team know and we'll be pleased to assist. Enjoy!

The Young Persons' Plan for the Planet Team
