# Supplementary material
Source: MDPI journal article supplement (https://www.mdpi.com/2071-1050/11/20/5817)
Supplement: s1 [file s1]

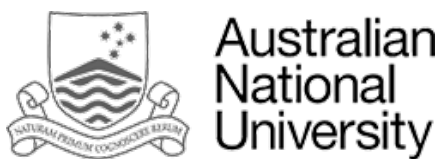

## INTRODUCTION

Thank you for taking the time to participate in this important research. We are researchers from the Australian National University (ANU), the University of New South Wales (UNSW) and the University of Technology Sydney (UTS) conducting a survey of people's views and opinions about climate change and related government policy.

The aim of this project is to better understand the general attitudes of different age groups with regards to global warming and climate change. Your participation is absolutely critical to the success of this project.

Only through your responses can we better understand public perception of the Australian stance on climate change and help decision makers accurately represent these views of the public.

## IMPORTANT INSTRUCTIONS

While completing the survey please refrain from using the back/forward navigation buttons or arrows in your web browser as it might close the survey window. Please note that if the survey window is closed before you finish the survey, you can use the survey link provided previously to re-open the survey window and complete the survey. Before commencing the study we ask that you make sure you have read the information sheet provided on the previous screen and provide an electronic signature on the consent form that follows. We very much appreciate your time and participation.

Thank you.

**Professor John Roberts,**  
University of New South Wales

**Professor Pam Morrison,**  
University of Technology, Sydney

**Ian Chambers,**  
Australian National University

## PARTICIPANT INFORMATION SHEET

Thank you for taking the time to participate in this important research. This project is being conducted by researchers from the Australian National University (ANU), the University of New South Wales (UNSW) and the University of Technology Sydney (UTS). In order for you to decide whether or not you take part in this study, you should understand the nature of the survey so you can make an informed decision about your participation. Once you understand the study and have decided to participate you will be asked to electronically sign a consent form on the next page.

**Project Title:** Public Perception of Climate Change in Australia

**General Outline of the Project:** The aim of this project is to get a better understanding of how young Australians perceive climate change and what actions, if any young Australians are taking or feel should be taken. Your school has been selected from schools across Australia to participate in this project. We will use the results of this study to better understand how we can build a more sustainable Australia. Funding support for this project has been received from UNSW, Inspiring Australia, Questacon and ANU.

**Participant Involvement:** Participation in the project is voluntary and you may, without negative consequences, decline to take part or withdraw from the research without providing an explanation at any time. You will be asked to complete a questionnaire about your interest and attitudes to sustainability, however, you can decline to answer any questions and participation is completely anonymous. The research is being conducted completely online, and should take about 20 minutes to complete, however, you can take as long as you like to complete the questionnaire as this is a learning exercise for participants as well as a research study.

**Potential Benefits:** The benefits of the research will be to help you better understand the nature and scope of climate change in Australia as part of the Young Australians' Plan for the Planet Program, and also provide policy implementation guidelines regarding climate change.

**Confidentiality:** All responses to this survey will be kept strictly confidential. Your name or identity will not be linked in any way to the research data.

**Data Storage:** The data will be stored at the ANU for at least five years from the date of any publication arising from the research.

**Potential Risks or Discomforts :** There are no potential risks or discomforts associated with this research.

**Right to Refuse or Withdraw:** Your participation is completely voluntary and you may refuse to participate or withdraw from this study, or decline to answer any questions, without prejudice or discrimination from the researchers, at any time.

**Contact Information:** If you have any questions about the research or your participation in the research you may contact:

**Professor John Roberts**

Email: [johnr@agsm.edu.au](mailto:johnr@agsm.edu.au)

**Professor Pam Morrison**

Email: [Pamela.morrison@uts.edu.au](mailto:Pamela.morrison@uts.edu.au)

**Ian Chambers, PhD Scholar, The Crawford School of Public Policy, Australian National University**

Email: [ian.chambers@anu.edu.au](mailto:ian.chambers@anu.edu.au)

The ethical aspects of this research have been approved by the ANU Human Research Ethics Committee (Protocol 2016/702). If you have any concerns or complaints about how this research has been conducted, please contact:

Ethics Manager  
The ANU Human Research Ethics Committee  
The Australian National University  
Telephone: +61 2 6125 3427  
Email: [Human.Ethics.Officer@anu.edu.au](mailto:Human.Ethics.Officer@anu.edu.au)

**REMEMBER: ALWAYS USE THE 'NEXT' BUTTON WITHIN THE SURVEY TO MOVE THROUGH THE QUESTIONNAIRE. DO NOT USE THE WEB BROWSER BACK BUTTON OR THE SURVEY MAY CLOSE. THANK YOU**

### \* 1. **CONSENT FORM**

By checking the box "**I Agree**" in the space below and by completing the survey, I am giving my consent to participate in the study and further declare that: I have read the information sheet in full and I understand it completely. All of my questions, if I had any, regarding the information sheet or this study have been answered to my satisfaction. I agree to participate in this research. I am providing informed consent for this study. I am at least 18 years of age, or if I am under 18 years old, I have my schools permission to take part in this survey.

☐ **I Agree**

### \* 2. Firstly, let us know which groups your schools is in by clicking on the below buttons: the**GREEN GROUP** or the **BLUE GROUP**.

☐ **GREEN GROUP:** Click here

You are in the GREEN group if your school is going to start the Plan for the Planet Program this year. If you are not sure, check to see which groups your school has been allocated to on the Research page of the Young Australians' Plan for the Planet Website.

☐ **BLUE GROUP:** Click here

You are in the BLUE group if your school is a partner school and is going to start the Young Australians Plan for the Planet Program next year. Ask your teacher if you are not sure. If you are not sure, check to see which groups your school has been allocated to on the Research page of the Young Australians' Plan for the Planet Website.

3. Now, if you are in the**green** group, could you also let us know which section below your school is participating in?

☐ T Section

☐ B Section

☐ I Section

☐ O Section

---

\* 4. Do you think that global climate change is occurring at present?

☐ Yes

☐ No

---

5. Do you think global climate change is likely to occur over the next five years?

☐ Yes

☐ No

---

6. How certain are you of your answer about climate change occurring?

☐ Very uncertain

☐ Somewhat uncertain

☐ Somewhat certain

☐ Very certain

7. To what extent do you think climate change has happened in the past five years, relative to historic rates?

☐ Not at all

☐ Slower

☐ About the same rate

☐ A little faster

☐ Much faster

☐ Dramatically faster

8. To what extent do you think climate change will be more or less severe over the next five years relative to the past five, given current trends?

- ☐ Not at all
- ☐ Less severe
- ☐ About the same severity
- ☐ A little more severe
- ☐ Much more severe
- ☐ Dramatically more severe

9. To what extent do you think the climate change that occurred over the past five years has been induced by human activities, and to what extent is it a function of natural causes?

- ☐ Exclusively due to natural causes
- ☐ Mainly due to natural causes
- ☐ Fairly equal combination of both
- ☐ Mainly due to human activities
- ☐ Exclusively due to human activities

10. Do you think that extreme weather events such as floods, heatwaves and violent storms are occurring more often now than in the past?

- ☐ No more
- ☐ Slightly more
- ☐ Moderately more
- ☐ Considerably more
- ☐ A lot more



13. How certain are you of your answer about climate change occurring?

- ☐ Very uncertain
- ☐ Somewhat uncertain
- ☐ Somewhat certain
- ☐ Very certain

14. To what extent do you think climate change has happened in the past five years, relative to historic rates?

- ☐ Not at all
- ☐ Slower
- ☐ About the same rate
- ☐ A little faster
- ☐ Much faster
- ☐ Dramatically faster

15. To what extent do you think climate change will be more or less severe over the next five years relative to the past five, given current trends?

- ☐ Not at all
- ☐ Less severe
- ☐ About the same severity
- ☐ A little more severe
- ☐ Much more severe
- ☐ Dramatically more severe

16. To what extent do you think the climate change that occurred over the past five years has been induced by human activities, and to what extent is it a function of natural causes?

- ☐ Exclusively due to natural causes
- ☐ Mainly due to natural causes
- ☐ Fairly equal combination of both
- ☐ Mainly due to human activities
- ☐ Exclusively due to human activities

17. Do you think that extreme weather events such as floods, heatwaves and violent storms are occurring more often now than in the past?

- ☐ No more
- ☐ Slightly more
- ☐ Moderately more
- ☐ Considerably more
- ☐ A lot more

18. To what extent do you think climate change has been a cause of each of the following possible outcomes in the past five years and will cause each of the following outcomes in the next five years?

|                                                              | Not at all            | Slightly              | Moderately            | Considerably          | Totally               | Don't know            |
|--------------------------------------------------------------|-----------------------|-----------------------|-----------------------|-----------------------|-----------------------|-----------------------|
| Changing weather patterns                                    | <input type="radio"/> |
| Floods                                                       | <input type="radio"/> |
| Drought                                                      | <input type="radio"/> |
| Biodiversity decreases                                       | <input type="radio"/> |
| Community health problems                                    | <input type="radio"/> |
| Reduced personal income                                      | <input type="radio"/> |
| Reduced food production                                      | <input type="radio"/> |
| Rise in sea levels                                           | <input type="radio"/> |
| Reduced availability of fresh water for drinking and farming | <input type="radio"/> |

19. Do you think global climate change is likely to occur over the next five years?

- ☐ Yes
- ☐ No



20. How certain are you of your answer about climate change occurring?

- ☐ Very uncertain
- ☐ Somewhat uncertain
- ☐ Somewhat certain
- ☐ Very certain

21. To what extent do you think climate change has happened in the past five years, relative to historic rates?

- ☐ Not at all
- ☐ Slower
- ☐ About the same rate
- ☐ A little faster
- ☐ Much faster
- ☐ Dramatically faster

22. To what extent do you think climate change will be more or less severe over the next five years relative to the past five, given current trends?

- ☐ Not at all
- ☐ Less severe
- ☐ About the same severity
- ☐ A little more severe
- ☐ Much more severe
- ☐ Dramatically more severe

23. Do you think that extreme weather events such as floods, heatwaves and violent storms are occurring more often now than in the past?

- ☐ No more
- ☐ Slightly more
- ☐ Moderately more
- ☐ Considerably more
- ☐ A lot more

24. To what extent do you think climate change will be the cause of each of the following outcomes in the next five years?

|                                                              | Not at all            | Slightly              | Moderately            | Considerably          | Totally               | Don't know            |
|--------------------------------------------------------------|-----------------------|-----------------------|-----------------------|-----------------------|-----------------------|-----------------------|
| Changing weather patterns                                    | <input type="radio"/> |
| Floods                                                       | <input type="radio"/> |
| Drought                                                      | <input type="radio"/> |
| Biodiversity decreases                                       | <input type="radio"/> |
| Community health problems                                    | <input type="radio"/> |
| Reduced personal income                                      | <input type="radio"/> |
| Reduced food production                                      | <input type="radio"/> |
| Rise in sea levels                                           | <input type="radio"/> |
| Reduced availability of fresh water for drinking and farming | <input type="radio"/> |

25. How certain are you of your answer about climate change occurring?

- ☐ Very uncertain
- ☐ Somewhat uncertain
- ☐ Somewhat certain
- ☐ Very certain

26. To what extent do you think climate change has happened in the past five years, relative to historic rates?

- ☐ Not at all
- ☐ Slower
- ☐ About the same rate
- ☐ A little faster
- ☐ Much faster
- ☐ Dramatically faster

27. To what extent do you think climate change will be more or less severe over the next five years relative to the past five, given current trends?

- ☐ Not at all
- ☐ Less severe
- ☐ About the same severity
- ☐ A little more severe
- ☐ Much more severe
- ☐ Dramatically more severe

28. Do you think that extreme weather events such as floods, heatwaves and violent storms are occurring more often now than in the past?

- ☐ No more
- ☐ Slightly more
- ☐ Moderately more
- ☐ Considerably more
- ☐ A lot more

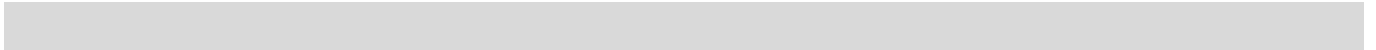



30. What are your thoughts about the following actions and policies in helping to prevent global climate change?

**How difficult do you think it would be to implement?**

|                                                                   | Not at all            | Slightly              | Moderately            | Very                  | Extremely             | Don't know            |
|-------------------------------------------------------------------|-----------------------|-----------------------|-----------------------|-----------------------|-----------------------|-----------------------|
| Government subsidies for energy efficient household equipment     | <input type="radio"/> |
| Government subsidies for energy efficient business equipment      | <input type="radio"/> |
| Government Support for a Cap and Trade or Emission trading system | <input type="radio"/> |
| Increased investment in renewable energy                          | <input type="radio"/> |
| International standards for more energy efficient products        | <input type="radio"/> |
| Introduction of a carbon tax                                      | <input type="radio"/> |
| Education about actions to reduce climate change                  | <input type="radio"/> |
| A self regulatory carbon usage scheme managed by business groups  | <input type="radio"/> |
| Improvements in public transport                                  | <input type="radio"/> |
| Investment in fuel efficient vehicles                             | <input type="radio"/> |

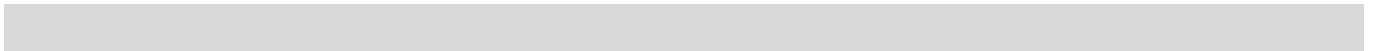

31. To what extent do you support and understand the following actions and policies in helping to prevent global climate change?

**Do you support this policy?**

[illegible]



34. To what extent do you think action to reduce the effects of climate change is the responsibility of each of the following groups?

|                         | Not at all responsible | Slightly responsible  | Moderately responsible | Considerably responsible | Primarily responsible | Don't know            |
|-------------------------|------------------------|-----------------------|------------------------|--------------------------|-----------------------|-----------------------|
| Individuals             | <input type="radio"/>  | <input type="radio"/> | <input type="radio"/>  | <input type="radio"/>    | <input type="radio"/> | <input type="radio"/> |
| Government              | <input type="radio"/>  | <input type="radio"/> | <input type="radio"/>  | <input type="radio"/>    | <input type="radio"/> | <input type="radio"/> |
| Business                | <input type="radio"/>  | <input type="radio"/> | <input type="radio"/>  | <input type="radio"/>    | <input type="radio"/> | <input type="radio"/> |
| Scientists              | <input type="radio"/>  | <input type="radio"/> | <input type="radio"/>  | <input type="radio"/>    | <input type="radio"/> | <input type="radio"/> |
| International community | <input type="radio"/>  | <input type="radio"/> | <input type="radio"/>  | <input type="radio"/>    | <input type="radio"/> | <input type="radio"/> |

35. We would like to better understand your attitude toward climate change and related issues. To what extent do you agree with the following statements?

[illegible]



[illegible]

|                                                                   | Strongly disagree     | Disagree              | Neither agree nor disagree | Agree                 | Strongly agree        | Don't Know            |
|-------------------------------------------------------------------|-----------------------|-----------------------|----------------------------|-----------------------|-----------------------|-----------------------|
| 19. Thinking about my identity, I view myself as a global citizen | <input type="radio"/> | <input type="radio"/> | <input type="radio"/>      | <input type="radio"/> | <input type="radio"/> | <input type="radio"/> |

36. We would be very grateful for any other thoughts you might have about global warming and climate change. Please list any other important issues below that you feel we have not adequately covered.

37. How likely is your household to take the following actions?

|                                                                      | Will never do         | Extremely unlikely    | Somewhat unlikely     | Somewhat likely       | Extremely likely      | Already do            |
|----------------------------------------------------------------------|-----------------------|-----------------------|-----------------------|-----------------------|-----------------------|-----------------------|
| Minimise household energy and fuel consumption                       | <input type="radio"/> |
| Install energy/ fuel efficient appliances at your own cost           | <input type="radio"/> |
| Replace appliances with energy/ fuel efficient ones at your own cost | <input type="radio"/> |
| Minimise household waste                                             | <input type="radio"/> |
| Use and donate reusable items                                        | <input type="radio"/> |
| Recycle                                                              | <input type="radio"/> |
| Buy organic/natural goods                                            | <input type="radio"/> |

38. Now we would like to compare your current understanding of climate change to what you thought three years ago. Three years ago, did you think that global climate change was occurring?

- ☐ Yes
- ☐ No

39. How certain were you three years ago about global climate change occurring?

- ☐ Very uncertain
- ☐ Uncertain
- ☐ Certain
- ☐ Very certain

40. Thinking about what is said in the news and other media, in your view, is the seriousness of climate change

- ☐ Generally exaggerated
- ☐ Generally correct
- ☐ Generally understated

41. How concerned are you, personally, about global warming and climate change?

- ☐ Not at all concerned
- ☐ A little bit concerned
- ☐ Somewhat concerned
- ☐ Very concerned

42. Which one of the following statements do you think is most accurate?

- ☐ Most scientists believe that global warming is occurring
- ☐ Most scientists believe that global warming is not occurring
- ☐ Most scientists are unsure about whether global warming is occurring or not

43. Did you support any of the following policies three years ago?

|                                                                   | Totally opposed       | Somewhat opposed      | Neither opposed nor supported | Somewhat supported    | Totally supported     |
|-------------------------------------------------------------------|-----------------------|-----------------------|-------------------------------|-----------------------|-----------------------|
| Government subsidies for energy efficient household equipment     | <input type="radio"/> | <input type="radio"/> | <input type="radio"/>         | <input type="radio"/> | <input type="radio"/> |
| Government subsidies for energy efficient business equipment      | <input type="radio"/> | <input type="radio"/> | <input type="radio"/>         | <input type="radio"/> | <input type="radio"/> |
| Government Support for a Cap and Trade or Emission trading system | <input type="radio"/> | <input type="radio"/> | <input type="radio"/>         | <input type="radio"/> | <input type="radio"/> |
| Increased investment in renewable energy                          | <input type="radio"/> | <input type="radio"/> | <input type="radio"/>         | <input type="radio"/> | <input type="radio"/> |
| International standard for more energy efficient products         | <input type="radio"/> | <input type="radio"/> | <input type="radio"/>         | <input type="radio"/> | <input type="radio"/> |
| Introduction of a carbon tax                                      | <input type="radio"/> | <input type="radio"/> | <input type="radio"/>         | <input type="radio"/> | <input type="radio"/> |
| Education about actions to reduce climate change                  | <input type="radio"/> | <input type="radio"/> | <input type="radio"/>         | <input type="radio"/> | <input type="radio"/> |
| A self regulatory carbon usage scheme managed by business groups  | <input type="radio"/> | <input type="radio"/> | <input type="radio"/>         | <input type="radio"/> | <input type="radio"/> |
| Improvements in public transport                                  | <input type="radio"/> | <input type="radio"/> | <input type="radio"/>         | <input type="radio"/> | <input type="radio"/> |
| Investment in fuel efficient vehicles                             | <input type="radio"/> | <input type="radio"/> | <input type="radio"/>         | <input type="radio"/> | <input type="radio"/> |

44. Have you undertaken any of the following behaviours in the past 3 years? Please check all that apply

- ☐ Purchased carbon offsets for air travel
- ☐ Purchased an electrical device that is more energy efficient than an alternative
- ☐ Participated in activities to help raise awareness of climate change in your community
- ☐ Walked, cycled or used public transport more than before

Now remember, this survey is **anonymous**. Your answers cannot be identified with you personally, nor do we want to. We are interested in the views of people of all ages. We would be very grateful if you could indicate your best guess as to how your parents would feel about some of these issues. Again, there are no right or wrong answers, we are just trying to gauge community sentiment.

45. Do you think that your parents believe that climate change is occurring at present?

- ☐ Yes
- ☐ No
- ☐ Don't know

46. How certain are you of your answer about what you think your parents believe about climate change occurring?

- ☐ Very Uncertain
- ☐ Somewhat Uncertain
- ☐ Somewhat Certain
- ☐ Very Certain
- ☐ Don't know

47. To what extent do you think your parents believe the climate change that occurred over the past five years has been induced by human activities, and to what extent is it a function of natural causes?

- ☐ Exclusively due to natural causes
- ☐ Mainly due to natural causes
- ☐ Fairly equal combination of both
- ☐ Mainly due to human activities
- ☐ Exclusively due to human activities

48. How would your parents regard what is said in the news and other media about is the seriousness of climate change:

- ☐ Generally exaggerated
- ☐ Generally correct
- ☐ Generally understated
- ☐ I don't know

49. How concerned do you think that your parents are about global warming and climate change?

- ☐ Not at all concerned
- ☐ A little bit concerned
- ☐ Somewhat concerned
- ☐ Very concerned
- ☐ I don't know

#### Demographics

50. What is your residential postcode?

51. Thank you so much for participating in this survey.

PLEASE CLICK ON THE **"I Acknowledge"** BUTTON BELOW TO ACKNOWLEDGE THAT YOU HAVE COMPLETED THE SURVEY AND TO SUBMIT YOUR RESPONSES.

Thank you again for participating in this important research, it is appreciated.

- ☐ I Acknowledge
