# Supplementary material
Source: MDPI journal article supplement (https://www.mdpi.com/2071-1050/11/20/5817)
Supplement: s1 [file s1]

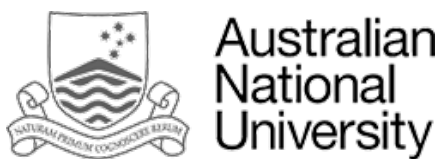

## **INTRODUCTION**

Thank you for taking the time to participate in this important research. We are researchers from the Australian National University (ANU), the University of New South Wales (UNSW) and the University of Technology Sydney (UTS) conducting a survey of people's views and opinions about climate change and related government policy.

The aim of this project is to better understand the general attitudes of different age groups with regards to global warming and climate change. Your participation is absolutely critical to the success of this project.

Only through your responses can we better understand public perception of the Australian stance on climate change and help decision makers accurately represent these views of the public.

## **IMPORTANT INSTRUCTIONS**

While completing the survey please refrain from using the back/forward navigation buttons or arrows in your web browser as it might close the survey window. Please note that if the survey window is closed before you finish the survey, you can use the survey link provided previously to re-open the survey window and complete the survey. Before commencing the study we ask that you make sure you have read the information sheet provided on the previous screen and provide an electronic signature on the consent form that follows. We very much appreciate your time and participation.

Thank you

**Ian Chambers**

Australian National University

**Professor Robert Costanza**

Australian National University

## PARTICIPANT INFORMATION SHEET

Thank you for taking the time to participate in this important research. This project is being conducted by researchers from the Australian National University (ANU). In order for you to decide whether or not you take part in this study, you should understand the nature of the survey so you can make an informed decision about your participation. Once you understand the study and have decided to participate you will be asked to electronically sign a consent form on the next page.

**Project Title:** Future Scenarios for Australia in 2050

**General Outline of the Project:** The aim of this project is to get a better understanding of preferences for future scenarios for Australia in 2050. This research is part of an Australian wide national study of these preferred futures for Australia.

**Participant Involvement:** Participation in the project is voluntary and you may, without negative consequences, decline to take part or withdraw from the research without providing an explanation at any time. You will be asked to review a range of potential future scenarios and then complete a questionnaire about your preferred future scenario, your interests and attitudes. You can decline to answer any questions and participation is completely anonymous. The research is being conducted completely online, and should take about 20 minutes to complete.

**Potential Benefits:** The benefits of the research will be to help us better understand the national preferred future scenarios for Australia in 2050, and therefore provide policy implementation guidelines regarding these preferred future scenarios.

**Confidentiality:** All responses to this survey will be kept strictly confidential. Your name or identity will not be linked in any way to the research data.

**Data Storage:** The data will be stored at the ANU for at least five years from the date of any publication arising from the research.

**Potential Risks or Discomforts :** There are no potential risks or discomforts associated with this research.

**Right to Refuse or Withdraw:** Your participation is completely voluntary and you may refuse to participate or withdraw from this study, or decline to answer any questions, without prejudice or discrimination from the researchers, at any time.

**Contact Information:** If you have any questions about the research or your participation in the research you may contact:

**Ian Chambers, PhD Scholar, The Crawford School of Public Policy, Australian National University**

Email: [ian.chambers@anu.edu.au](mailto:ian.chambers@anu.edu.au)

**Professor Robert Costanza**

Email: [robert.costanza@anu.edu.au](mailto:robert.costanza@anu.edu.au)

The ethical aspects of this research have been approved by the ANU Human Research Ethics Committee (Protocol 2016/702). If you have any concerns or complaints about how this research has been conducted, please contact:

Ethics Manager

The ANU Human Research Ethics Committee

The Australian National University

Telephone: +61 2 6125 3427

Email: [Human.Ethics.Officer@anu.edu.au](mailto:Human.Ethics.Officer@anu.edu.au)

**REMEMBER: ALWAYS USE THE 'NEXT' BUTTON WITHIN THE SURVEY TO MOVE THROUGH THE QUESTIONNAIRE. DO NOT USE THE WEB BROUSER BACK BUTTON OR THE SURVEY MAY CLOSE. THANK YOU**

**Welcome to this survey of your thoughts regarding scenarios for Australia's future. By now you should have taken some time to read and explore the 4 scenarios we have described, so that you have a clear sense of which are your most and least preferred. If you have not done that please return to the scenarios. Thank you for being involved.**

**Completing this survey should take about 10 minutes. Your responses will be confidential and we do not collect identifying information such as your name or ip address.**

- \* 1. Please rank the following from most to least preferred with 1 = most preferred and 4 = least preferred future. Please make sure to enter a unique rank for each scenario

|  |                      |                      |
|--|----------------------|----------------------|
|  | <input type="text"/> | Free Enterprise      |
|  | <input type="text"/> | Strong Individualism |
|  | <input type="text"/> | Community Well-Being |
|  | <input type="text"/> | Coordinated Action   |

- \* 2. How satisfied would you be.

If you imagine yourself living in each of these futures, how satisfied do you think you would be with your life:

|                      | Very Dissatisfied     | Dissatisfied          | Neutral               | Satisfied             | Very Satisfied        | Unsure                |
|----------------------|-----------------------|-----------------------|-----------------------|-----------------------|-----------------------|-----------------------|
| Free Enterprise      | <input type="radio"/> |
| Strong Individualism | <input type="radio"/> |
| Community Well-Being | <input type="radio"/> |
| Coordinated Action   | <input type="radio"/> |

3. Which scenario best reflects where you think Australia is currently?

- ☐ Free Enterprise  
☐ Strong Individualism  
☐ Community Well-Being  
☐ Coordinated Action

4. Which scenario do you think Australia is headed toward?

- ☐ Free Enterprise  
☐ Strong Individualism  
☐ Community Well-Being  
☐ Coordinated Action

5. Which scenario do think most other Australians would prefer in the future?

- ☐ Free Enterprise
- ☐ Strong Individualism
- ☐ Community Well-Being
- ☐ Coordinated Action

6. The questions below ask you about aspirations you may have for yourself for the future. For each question, select a response that indicates how important it is to you that the personal goal be attained in the future.

|                                                  | Not important at all  | Not very important    | neutral               | Somewhat important    | Very important        |
|--------------------------------------------------|-----------------------|-----------------------|-----------------------|-----------------------|-----------------------|
| Being known and admired by many people           | <input type="radio"/> |
| Having close personal relationships              | <input type="radio"/> |
| Achieving affluence and financial success        | <input type="radio"/> |
| Helping those who need help                      | <input type="radio"/> |
| Projecting an appealing and attractive image     | <input type="radio"/> |
| Attaining self-understanding and personal growth | <input type="radio"/> |

7. The questions below again ask you about the same personal goals and aspirations, but in this case, for each goal, indicate **how much time and energy do you invest in achieving that goal in your current personal life.**

|                                                  | Don't work on it at all | Not much              | neutral               | A bit                 | Work on it a lot      |
|--------------------------------------------------|-------------------------|-----------------------|-----------------------|-----------------------|-----------------------|
| Being known and admired by many people           | <input type="radio"/>   | <input type="radio"/> | <input type="radio"/> | <input type="radio"/> | <input type="radio"/> |
| Having close personal relationships              | <input type="radio"/>   | <input type="radio"/> | <input type="radio"/> | <input type="radio"/> | <input type="radio"/> |
| Achieving affluence and financial success        | <input type="radio"/>   | <input type="radio"/> | <input type="radio"/> | <input type="radio"/> | <input type="radio"/> |
| Helping those who need help                      | <input type="radio"/>   | <input type="radio"/> | <input type="radio"/> | <input type="radio"/> | <input type="radio"/> |
| Projecting an appealing and attractive image     | <input type="radio"/>   | <input type="radio"/> | <input type="radio"/> | <input type="radio"/> | <input type="radio"/> |
| Attaining self-understanding and personal growth | <input type="radio"/>   | <input type="radio"/> | <input type="radio"/> | <input type="radio"/> | <input type="radio"/> |

8. Below are 9 statements about your current personal life. Using the rating scale below, indicate your degree of agreement with each item

|                                                                       | Strongly Disagree     | Disagree              | Neither Disagree<br>Nor Agree | Agree                 | Strongly Agree        |
|-----------------------------------------------------------------------|-----------------------|-----------------------|-------------------------------|-----------------------|-----------------------|
| I lead a purposeful and meaningful life                               | <input type="radio"/> | <input type="radio"/> | <input type="radio"/>         | <input type="radio"/> | <input type="radio"/> |
| My social relationships are supportive and rewarding                  | <input type="radio"/> | <input type="radio"/> | <input type="radio"/>         | <input type="radio"/> | <input type="radio"/> |
| I am engaged and interested in my daily activities                    | <input type="radio"/> | <input type="radio"/> | <input type="radio"/>         | <input type="radio"/> | <input type="radio"/> |
| I actively contribute to the happiness and well-being of others       | <input type="radio"/> | <input type="radio"/> | <input type="radio"/>         | <input type="radio"/> | <input type="radio"/> |
| I am competent and capable in the activities that are important to me | <input type="radio"/> | <input type="radio"/> | <input type="radio"/>         | <input type="radio"/> | <input type="radio"/> |
| I am a good person and live a good life                               | <input type="radio"/> | <input type="radio"/> | <input type="radio"/>         | <input type="radio"/> | <input type="radio"/> |
| I am optimistic about the future                                      | <input type="radio"/> | <input type="radio"/> | <input type="radio"/>         | <input type="radio"/> | <input type="radio"/> |
| People respect me                                                     | <input type="radio"/> | <input type="radio"/> | <input type="radio"/>         | <input type="radio"/> | <input type="radio"/> |
| Overall, I am satisfied with my life                                  | <input type="radio"/> | <input type="radio"/> | <input type="radio"/>         | <input type="radio"/> | <input type="radio"/> |

**Please complete the following demographic questions. It will not be possible to identify you from this information.**

9. What is your postcode?

10. What is your main country of residence?

11. What is your gender?

- ☐ Male
- ☐ Female
- ☐ Other

12. What political party would you vote for if an election were held today?

- ☐ Liberal
- ☐ National
- ☐ Labour
- ☐ Green
- ☐ Other
- ☐ No Preference

13. What is your age?

- ☐ 18 or younger
- ☐ 19 - 24
- ☐ 25 - 34
- ☐ 35 - 44
- ☐ 45 -54
- ☐ 55 - 64
- ☐ 65 - 74
- ☐ 75 or older

14. What is the highest level of qualification you have completed?

- ☐ Less than Year 10
- ☐ Year 10
- ☐ Year 12
- ☐ Trades
- ☐ Diploma or Certificate
- ☐ Undergraduate Degree
- ☐ Post Graduate Degree

15. Do you identify as Aboriginal or Torres Strait Islander?

- ☐ Yes
- ☐ No

16. What is your approximate household income before taxes?

- ☐ \$0 - \$24,999
- ☐ \$25,000 - \$49,999
- ☐ \$50,000 - \$74,999
- ☐ \$75,000 - \$99,999
- ☐ \$100,000 - \$124,999
- ☐ \$125,000 - \$149,999
- ☐ \$150,000 - \$174,999
- ☐ \$175,000 - \$199,999
- ☐ \$200,000 or more

17. How did you hear about this survey?

*Please select from the following dropdown menu*

Other (please specify)

18. Are there any other comments you would like to share?

19. If you would like to receive a copy of the results of this survey, enter your email address here
